# Supplementary material for: Involvement of actin cytoskeletal modifications in the inhibition of triple-negative breast cancer growth and metastasis by nimbolide
Source: PubMed Central journal article supplement — Mol Ther Oncolytics. 2021 Feb 24;20:596–606. doi: 10.1016/j.omto.2021.02.014 (PMC7972938; doi:10.1016/j.omto.2021.02.014), 2021-02-24

OMTO, Volume 20

## **Supplemental information**

**Involvement of actin cytoskeletal modifications  
in the inhibition of triple-negative breast  
cancer growth and metastasis by nimbolide**

**Arunkumar Arumugam, Ramadevi Subramani, and Rajkumar Lakshmanaswamy**

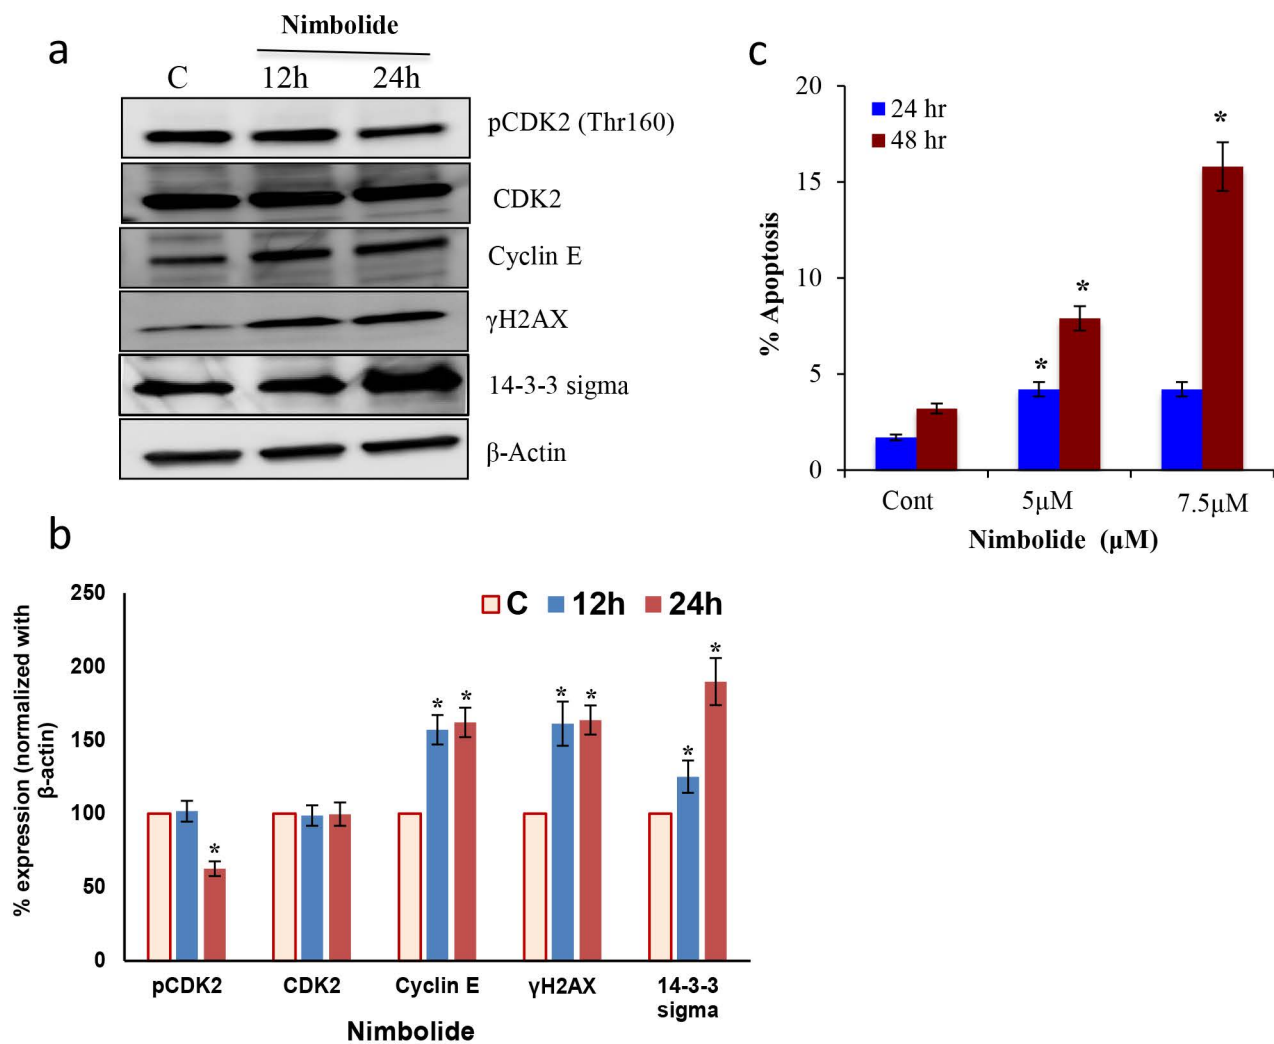

**Figure. S1:**

a. Analysis of cell cycle regulatory proteins in response to nimbolide treatment.

b. Densitometric analysis of Western blot data represented in Figure S1a

c. Nimbolide treatment increased apoptosis.

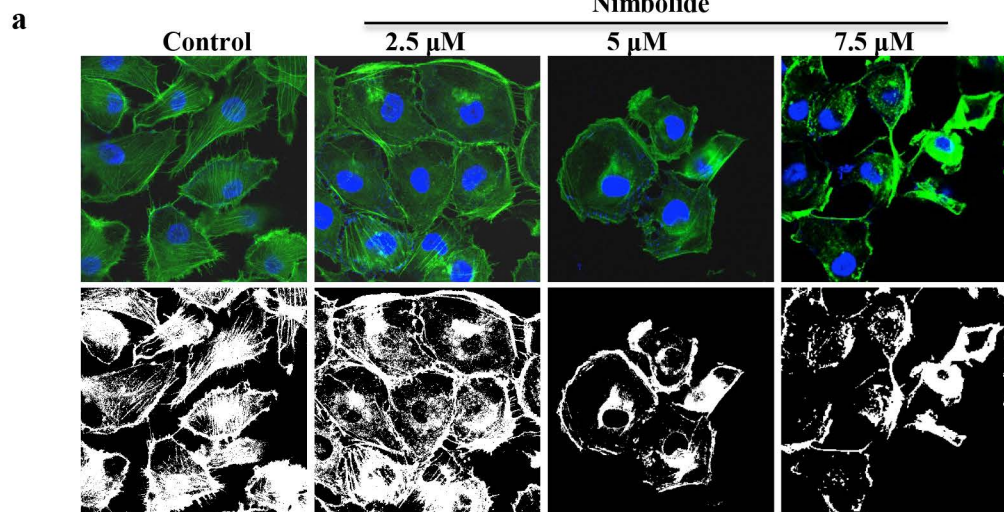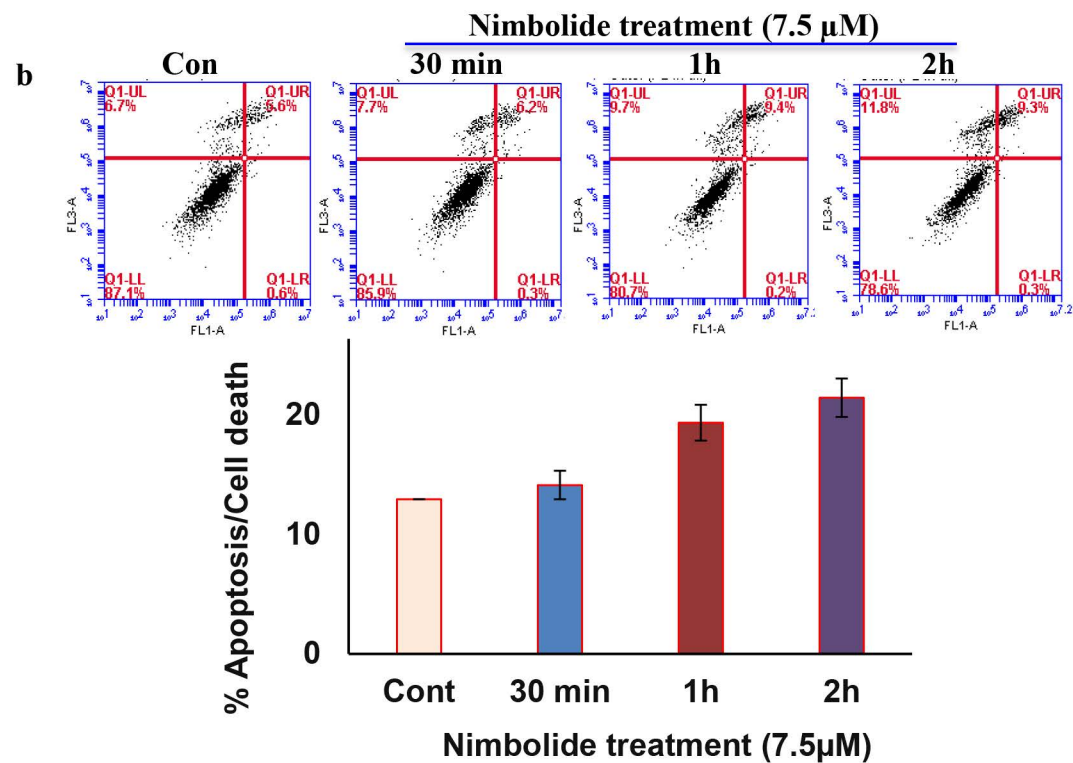

**Figure S2**

a: Immunofluorescent imaging of actin indicated that nimbolide treatment disrupted the actin network in a dose-dependent manner.  
 b: Flowcytometric apoptosis analysis using AnnexinV/PI staining indicated that nimbolide initiates apoptosis at early timepoints.

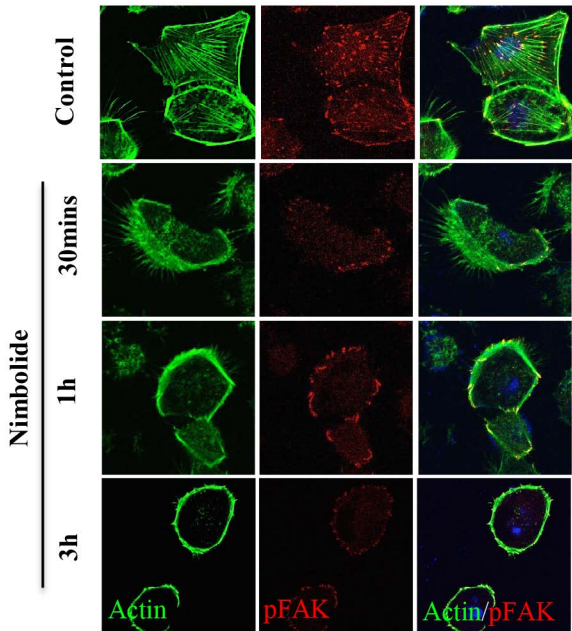

**Figure S3:** Immunofluorescence of pFAK and actin

**a**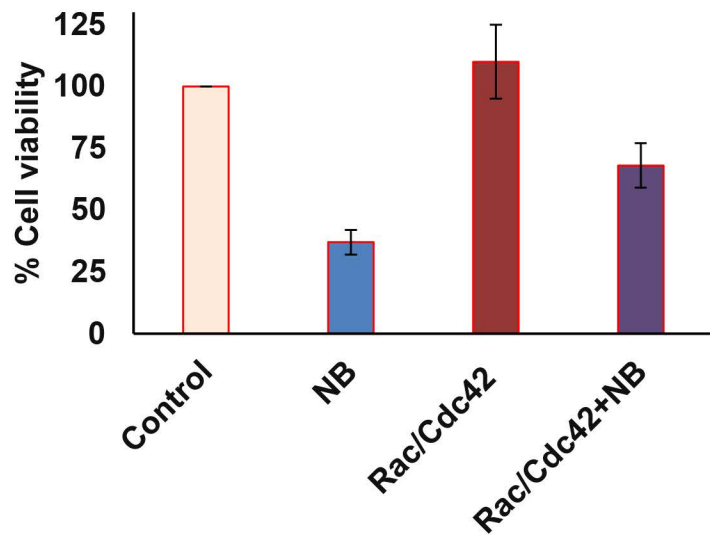**b**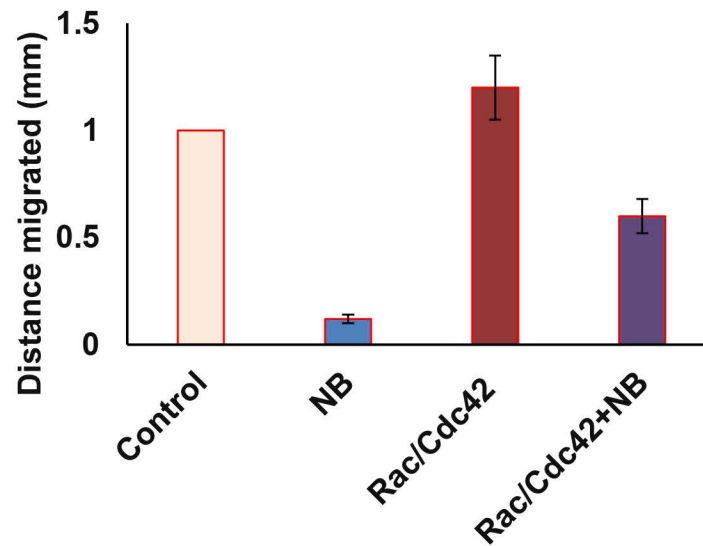**c**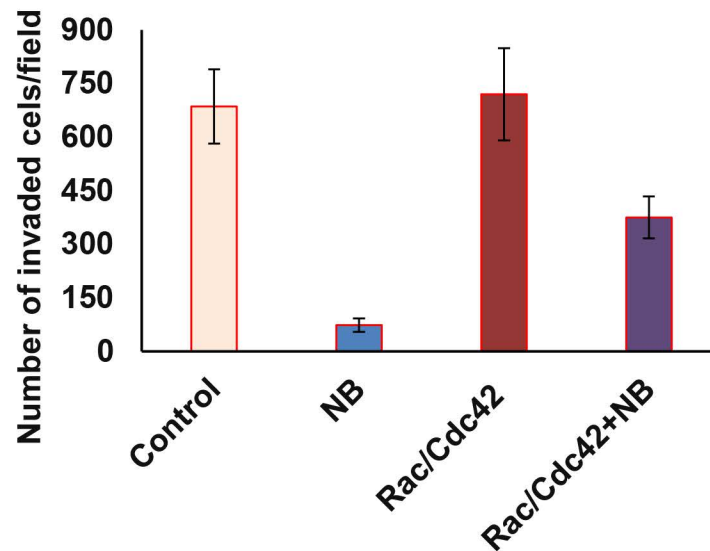

**Figure S4:** Rac1/Cdc42 activation rescued the anticancer effect of nimbolide a: cell viability, b: migration and c: invasion.

## **Supplemental Information:**

### **Supplemental Movie Legends:**

**Movie S1:** Live cell imaging (Actin): Nimbolide treatment induced actin cytoskeletal modification started as early as 10 minutes and affected almost all the cells by 90 minutes.

**Movie S2:** Control Actin-Actinin (Z-stalk): Confocal microscopy data indicated that in the control cells the expression and co-localization of  $\alpha$ -actinin was primarily found inside the cells and mainly at the base of lamellipodia structures.

**Movie S3:** Nimbolide treatment: Actin-Actinin (Z-stalk): Nimbolide treatment resulted in localization of  $\alpha$ -actinin at the cell surface and most of the  $\alpha$ -actinin was co-localized with actin indicating the strong stress fiber formation at the cell boundary.

**Movie S4:** Actin-Actinin (Volume-stalk): Immunofluorescence showing elongated focal adhesion points and prominent interaction with actin cytoskeleton in control cells.

**Movie S5:** Actin-Actinin (Volume-stalk): Nimbolide treatment strikingly down regulates the expression of pFAK and the actin networks are not complete.

**Table S1: List of Antibodies used in the study**

| Antibody               | Company              | Dilution |
|------------------------|----------------------|----------|
| AKT                    | Cell Signaling 4685  | 1:1000   |
| pAKT S473              | Cell Signaling 4060  | 1:1000   |
| mTOR                   | Cell Signaling 4517  | 1:1000   |
| pmTOR S2448            | Cell Signaling 5536  | 1:1000   |
| p70 S6 kinase          | Cell Signaling 9202  | 1:1000   |
| pp70 S6 kinase (T389)  | Cell Signaling 9206  | 1:1000   |
| 4EBP1                  | Cell Signaling 9644  | 1:1000   |
| p4EBP1 (T37/46)        | Cell Signaling 2855  | 1:1000   |
| JNK1                   | Cell Signaling 3708  | 1:1000   |
| p-SAPK/JNK (T183/Y185) | Cell Signaling 9255  | 1:2000   |
| P44/42 MAPK (Erk ½)    | Cell Signaling 9102  | 1:1000   |
| pERK T202/Y204         | Cell Signaling 4370  | 1:1000   |
| p38 MAPK               | Cell Signaling 9212  | 1:1000   |
| pp38 MAPK (T180/Y182)  | Cell Signaling 9211  | 1:1000   |
| Cleaved PARP           | Cell Signaling 5625  | 1:1000   |
| Cleaved Caspase 3      | Cell Signaling 9661  | 1:500    |
| Procaspase 3           | Abcam ab32150        | 1:1000   |
| Bim                    | Cell Signaling 2933  | 1:1000   |
| Bad                    | Santa Cruz SC-8044   | 1:200    |
| Bak                    | Cell Signaling 12105 | 1:1000   |
| Bax                    | Santacruz SC-7480    | 1:500    |
| Bcl2                   | Santacruz SC-578     | 1:500    |
| BclXL                  | Cell Signaling 4477  | 1:500    |
| E-cadherin             | Cell Signaling 3195  | 1:1000   |
| Slug                   | Cell Signaling 9585  | 1:1000   |
| Zeb1                   | Santa Cruz SC-515797 | 1:500    |
| β-catenin              | Cell Signaling 8480  | 1:1000   |
| Integrin αV            | Cell Signaling 4711  | 1:1000   |
| Integrin β3            | Cell Signaling 4702  | 1:1000   |
| Integrin β4            | Santa Cruz SC-6628   | 1:500    |
| ILK                    | Cell Signaling 3856  | 1:1000   |
| FAK                    | Cell Signaling 3285  | 1:1000   |
| pFAK (Y397)            | Cell Signaling 3283  | 1:1000   |
| Rac1                   | Abcam ab33186        | 1:1000   |
| Rac1+Cdc42             | Abcam ab76535        | 1:1000   |
| PAK1 phospho (S144)    | Abcam ab40795        | 1:5000   |
| PAK1                   | Abcam ab40852        | 1:500    |
| Cofilin                | Cell Signaling 5175  | 1:1000   |
| pCofilin (S3)          | Cell Signaling 3313  | 1:1000   |
| pVASP S157             | Cell Signaling 3111  | 1:1000   |

|                     |                      |        |
|---------------------|----------------------|--------|
| pVASP S239          | Cell Signaling 3114  | 1:1000 |
| Diaph1              | Invitrogen PA5-21409 | 1:500  |
| P44/42 MAPK (Erk ½) | Cell Signaling 9102  | 1:1000 |
| CDK2                | Cell Signaling 2546  | 1:1000 |
| pCDK2 (Thr160)      | Cell Signaling 2561  | 1:1000 |
| Cyclin E2           | Cell Signaling 4132  | 1:1000 |
| γH2AX               | Cell Signaling 2577  | 1:1000 |
| 14-3-3 σ            | Abcam ab14123        | 1:1000 |
| F-actin             | Abcam ab205          | 1:500  |
| β-actin             | Sigma A2228          | 1:1000 |



### Denistometric data for all western blots

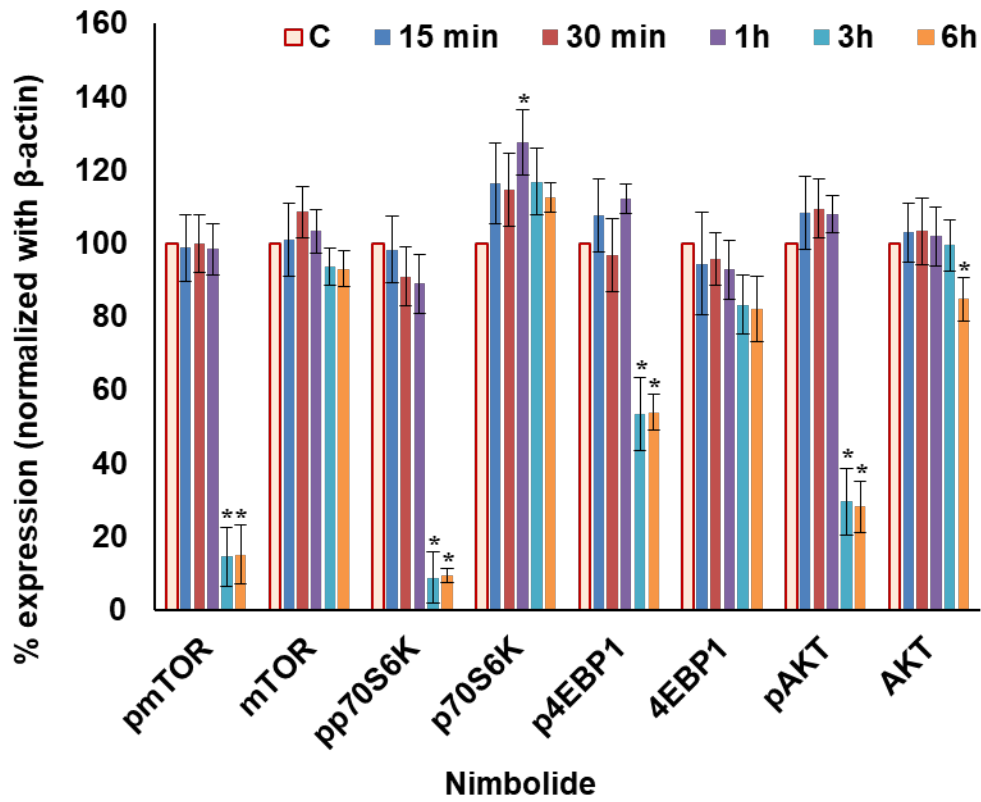

Densitometric analysis of Western blot data represented in Figure 1d.

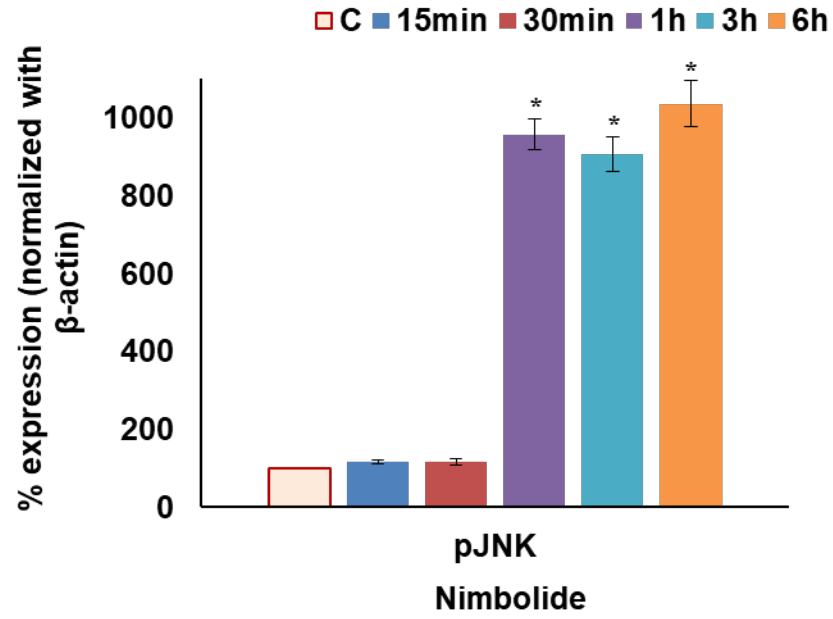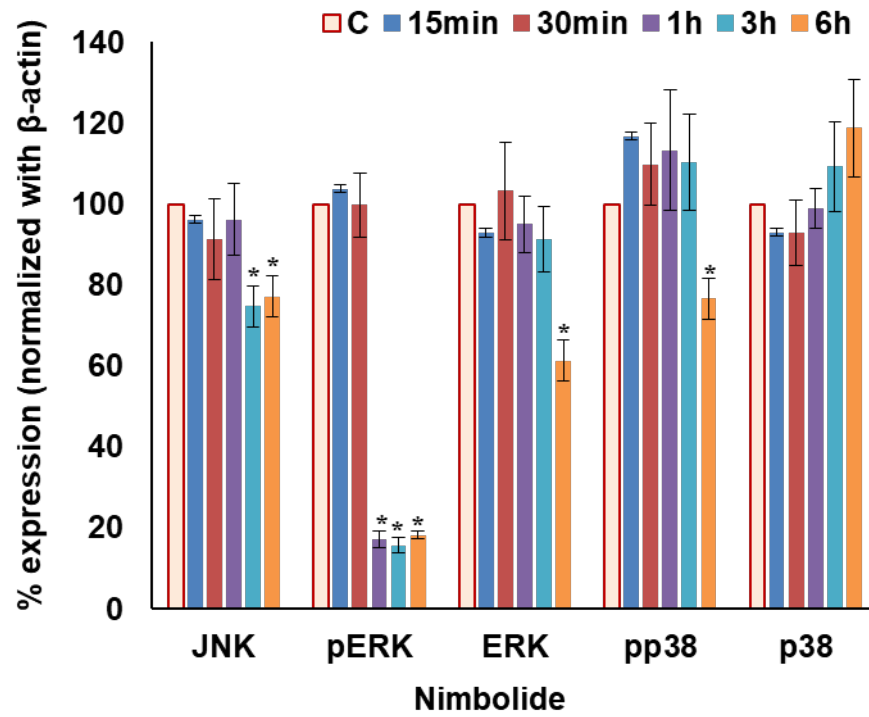

Densitometric analysis of Western blot data represented in Figure 1e.

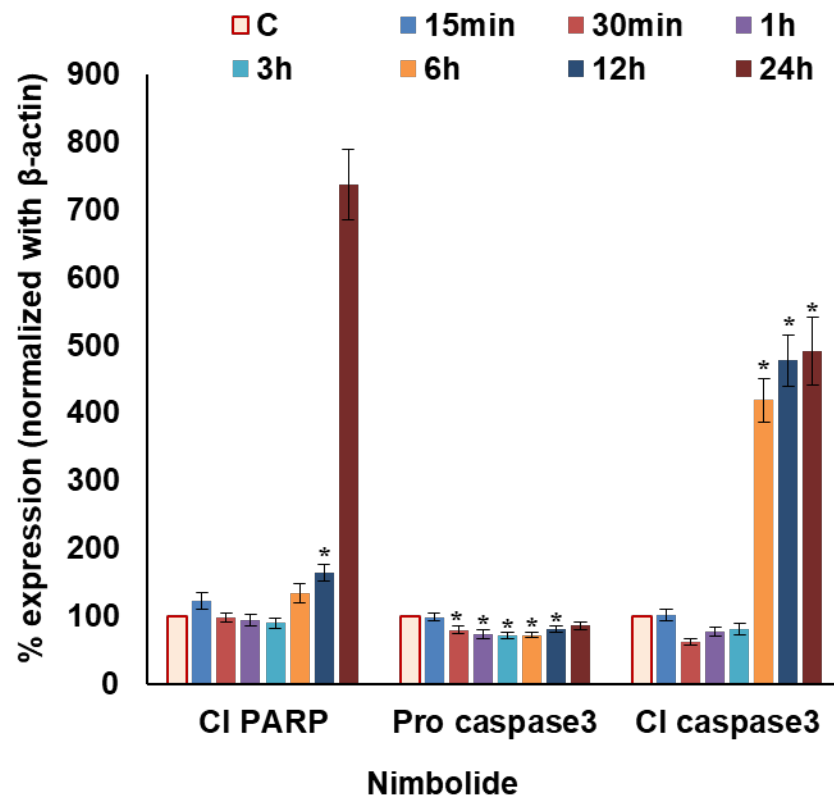

Densitometric analysis of Western blot data represented in Figure 2b.

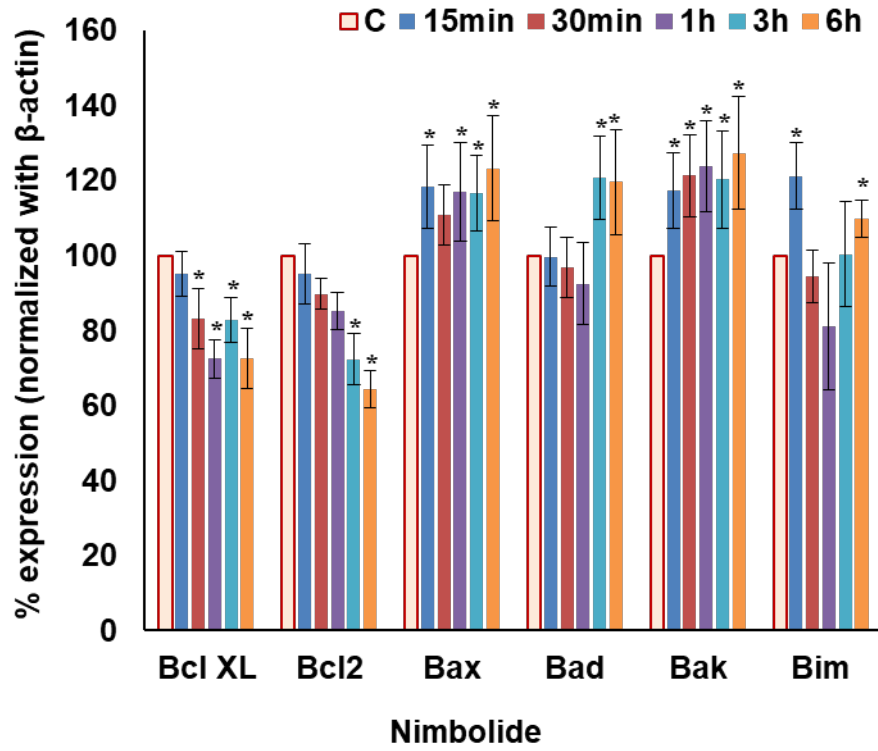

Densitometric analysis of Western blot data represented in Figure 2c.

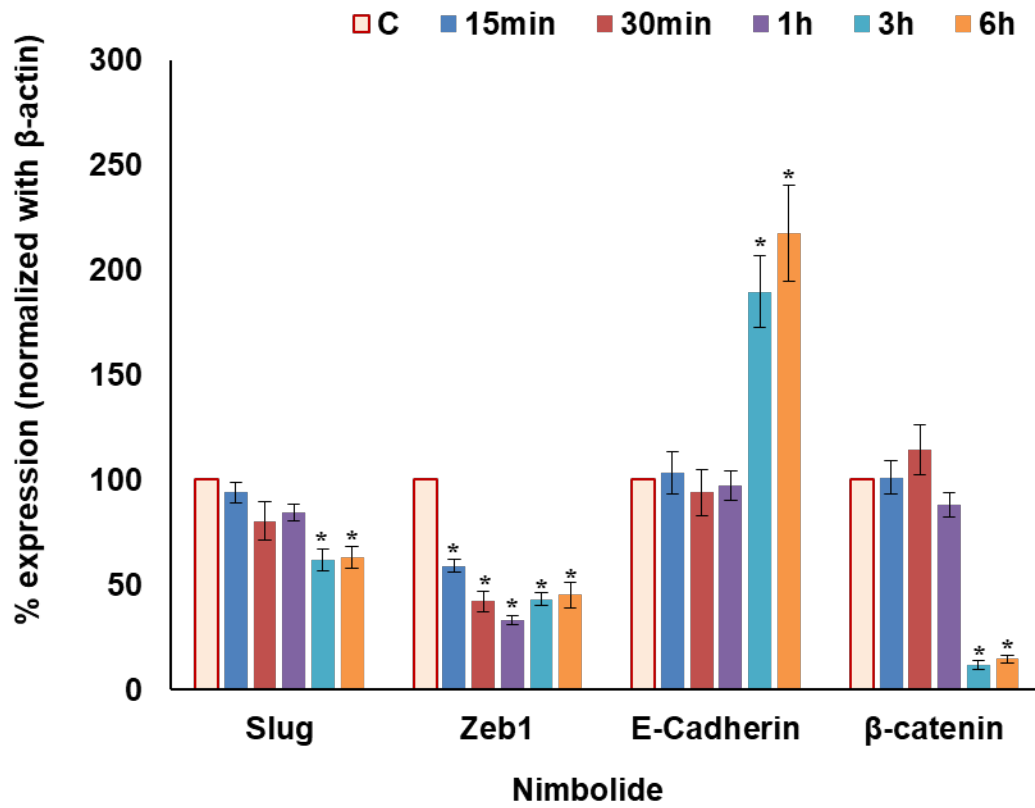

Densitometric analysis of Western blot data represented in Figure 2f.

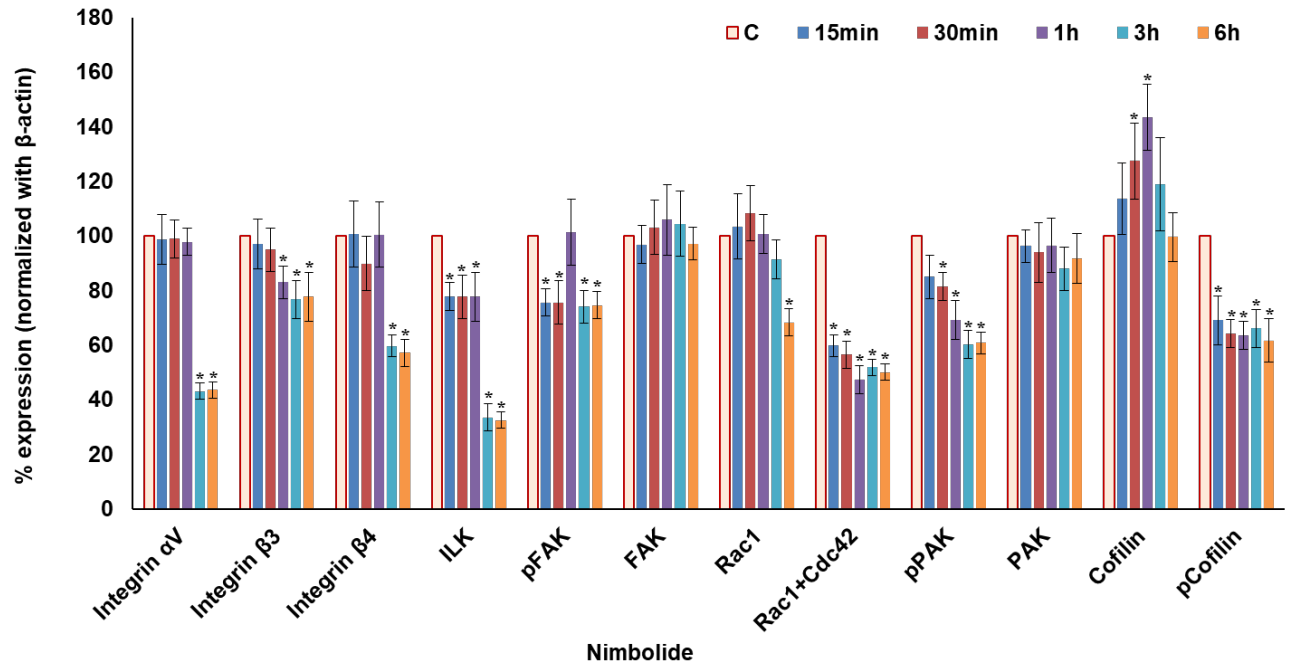

Densitometric analysis of Western blot data represented in Figure 4b.

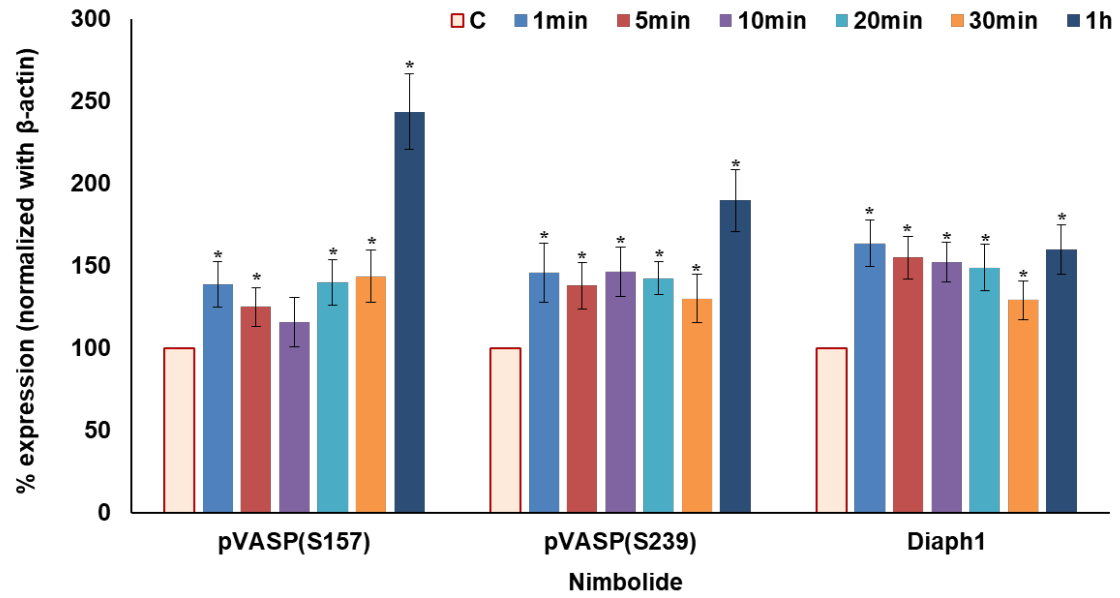

Densitometric analysis of Western blot data represented in Figure 4c.

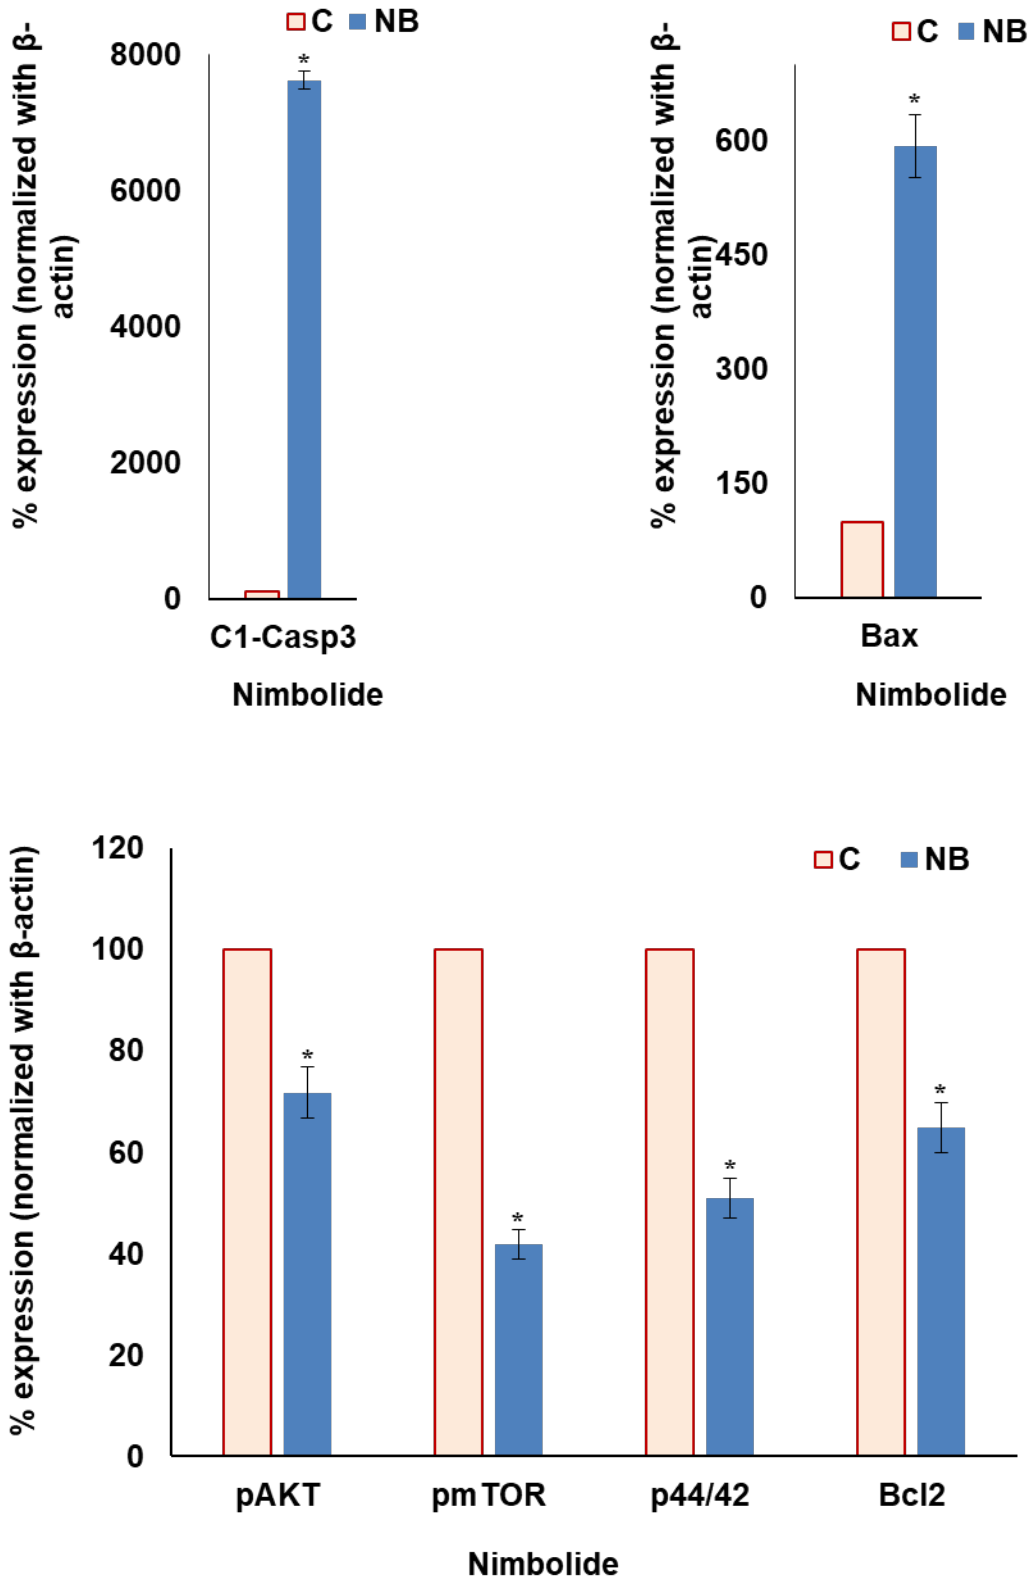

Densitometric analysis of Western blot data represented in Figure 6c1.



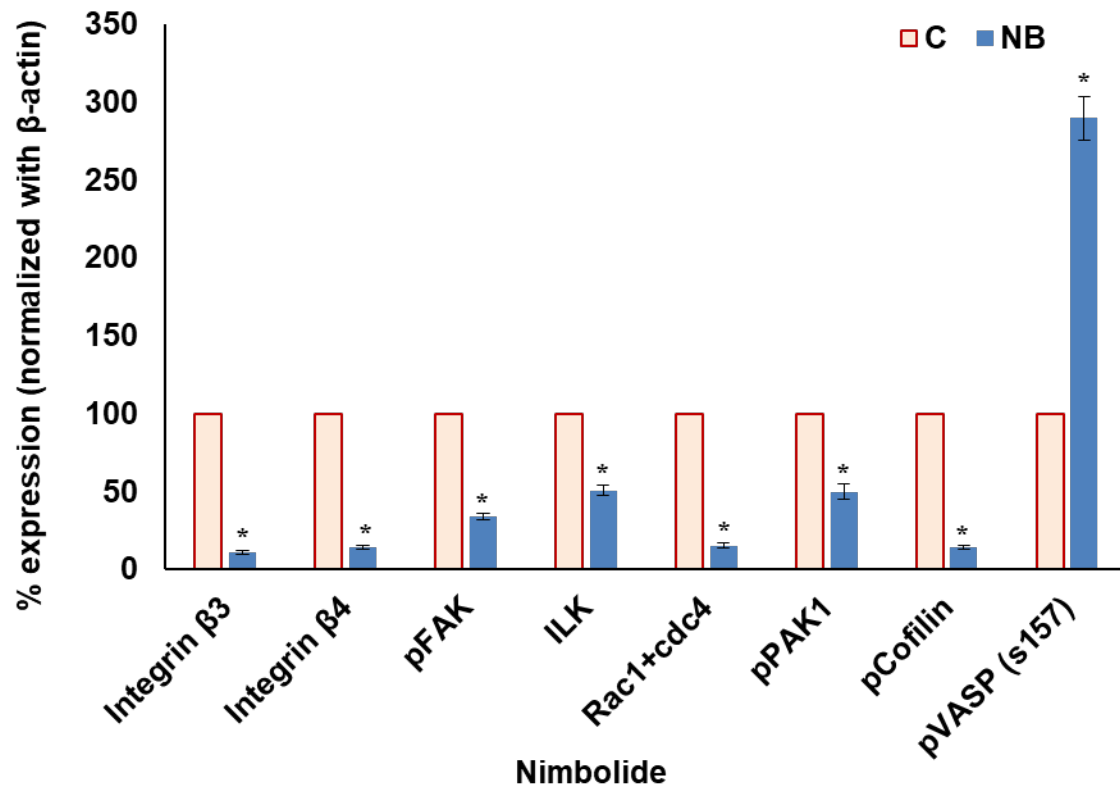

Densitometric analysis of Western blot data represented in Figure 6c2.

General pathways influenced by nimbolide. Our study demonstrates that nimbolide significantly alters FAK signaling in TNBC.

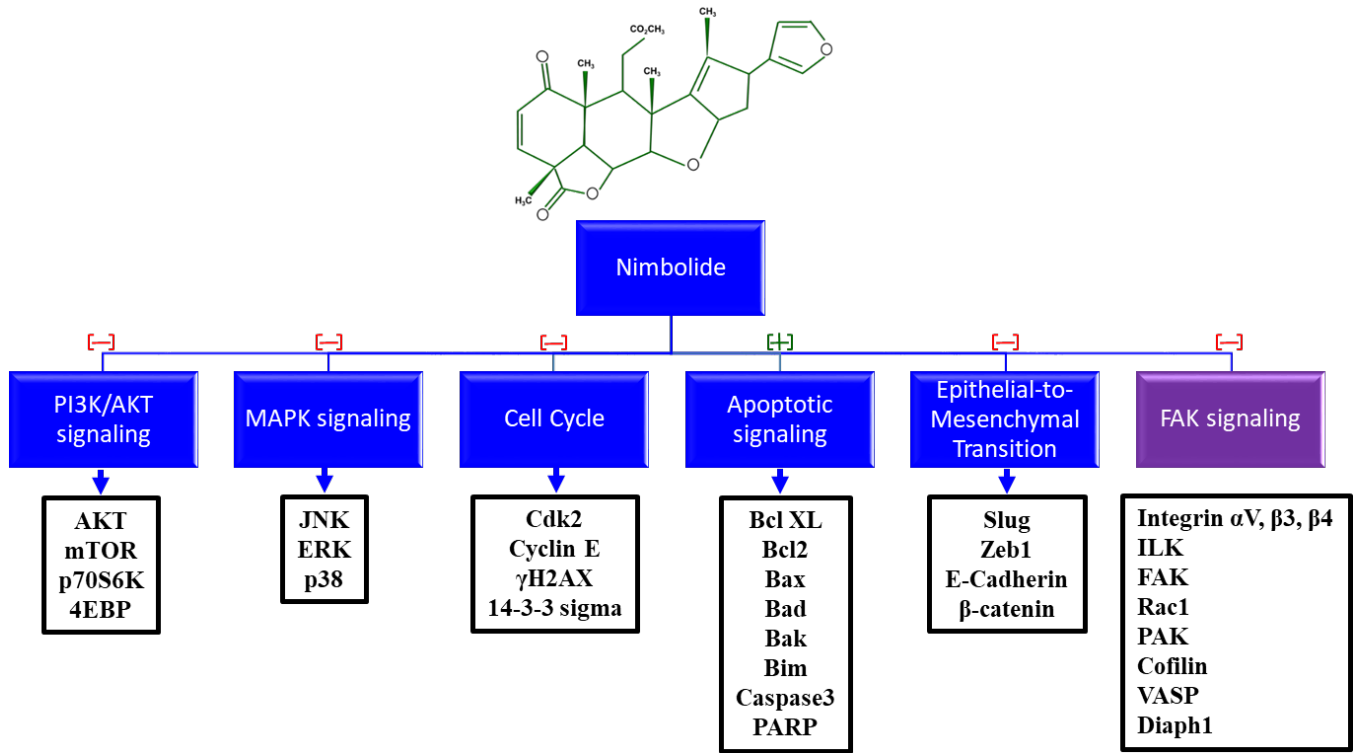

Supplement: mmc1.pdf [file mmc1.pdf]
